# Supplementary material for: Cost effectiveness analysis comparing repetitive transcranial magnetic stimulation to antidepressant medications after a first treatment failure for major depressive disorder in newly diagnosed patients – A lifetime analysis
Source: PLOS journal article supplement (doi:10.1371/journal.pone.0186950), 2017-10-26

# Cost-Effectiveness Analysis mid 20s

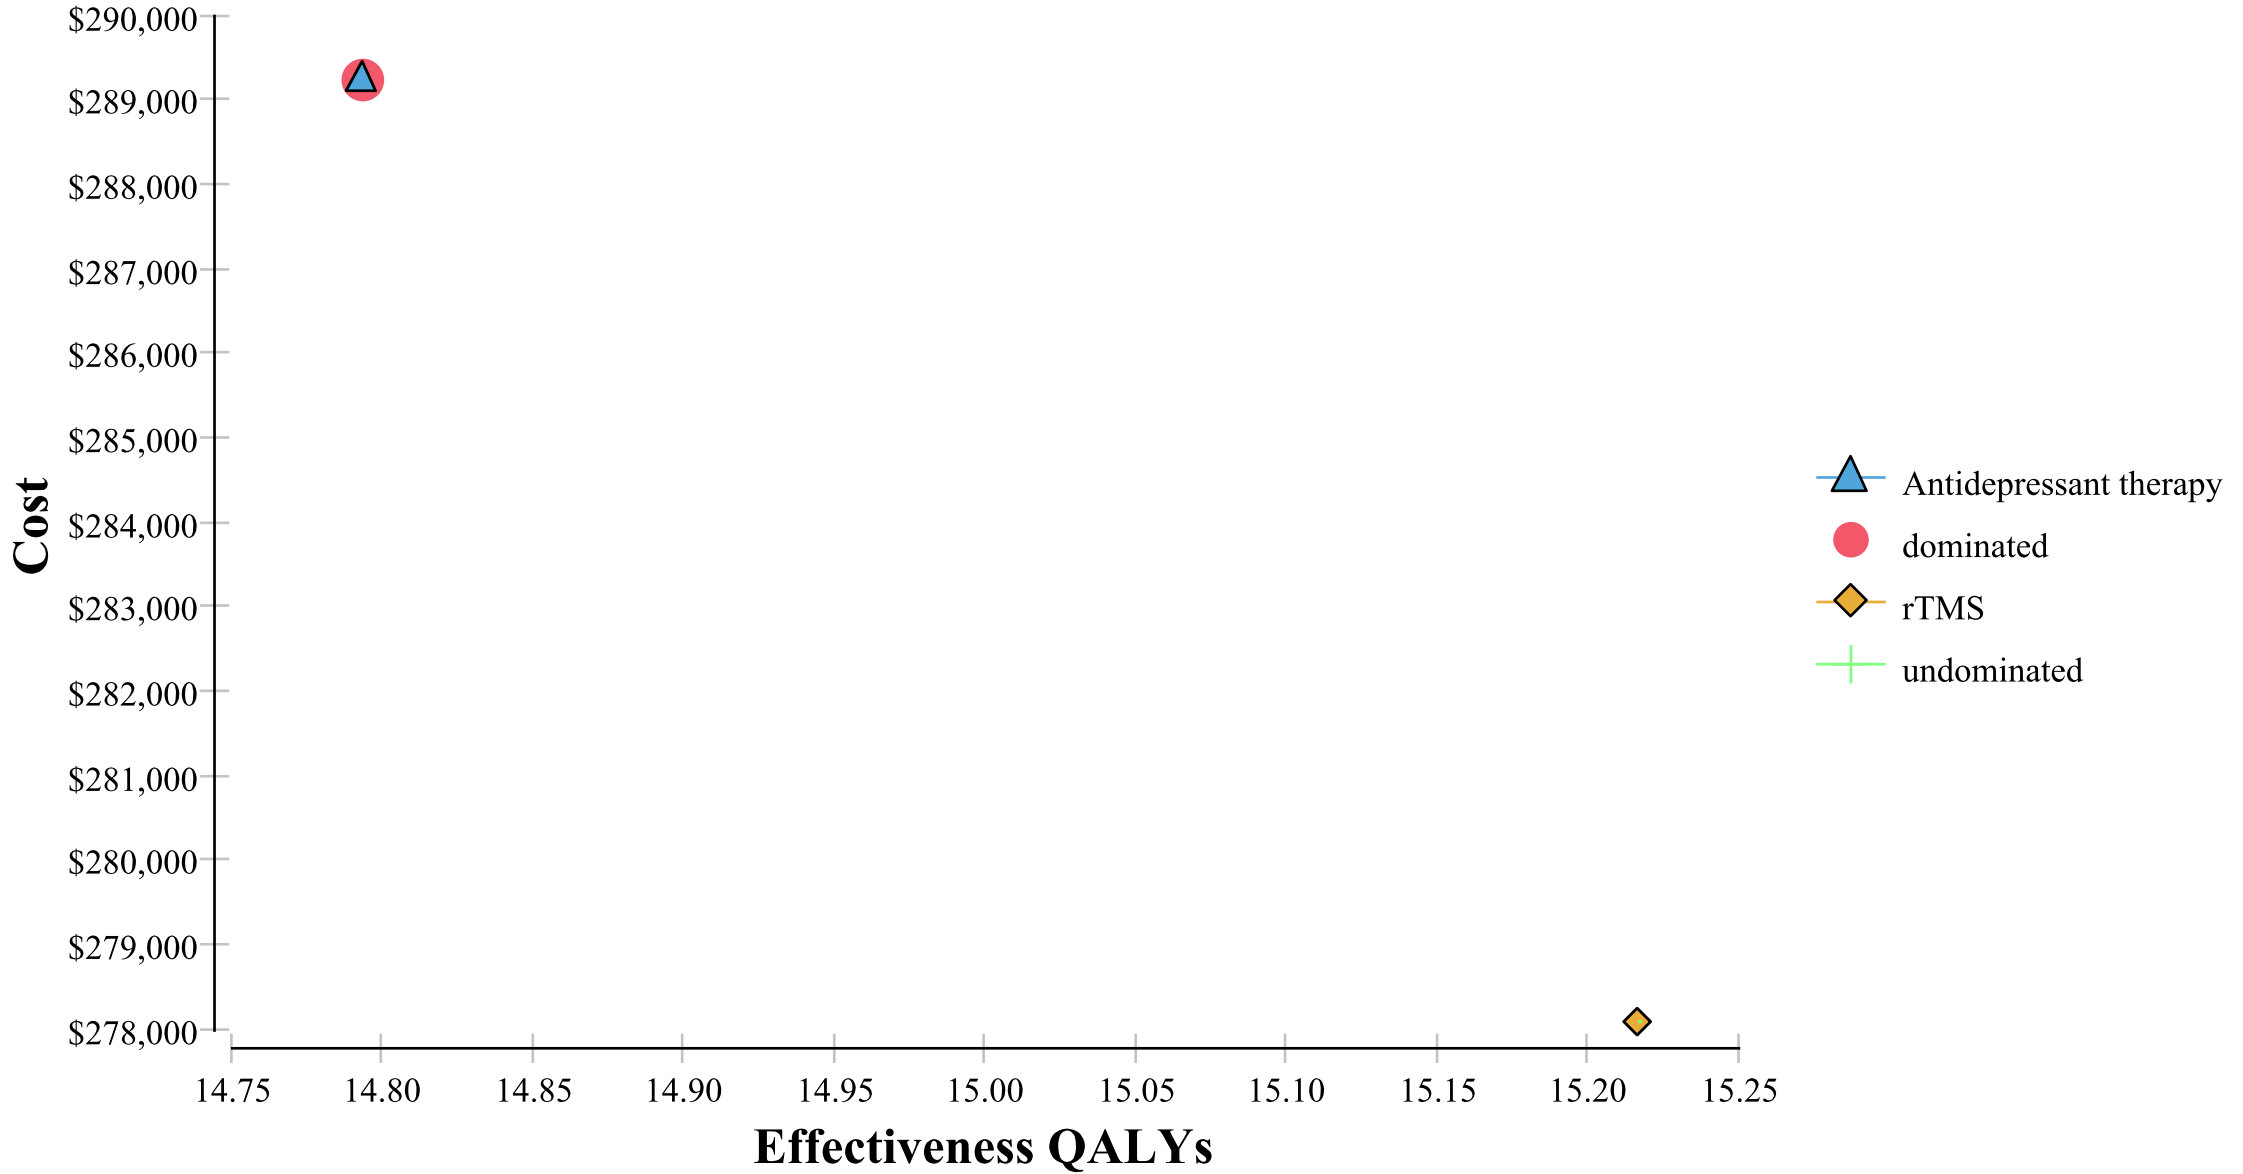

Supplement: S1 (10.1371/journal.pone.0186950.s001) [file journal.pone.0186950.s001]
