# Supplementary material for: Cost effectiveness analysis comparing repetitive transcranial magnetic stimulation to antidepressant medications after a first treatment failure for major depressive disorder in newly diagnosed patients – A lifetime analysis
Source: PLOS journal article supplement (doi:10.1371/journal.pone.0186950), 2017-10-26

S3 Fig

Incremental Cost-Effectiveness, rTMS v. Antidepressant therapy mid 30s

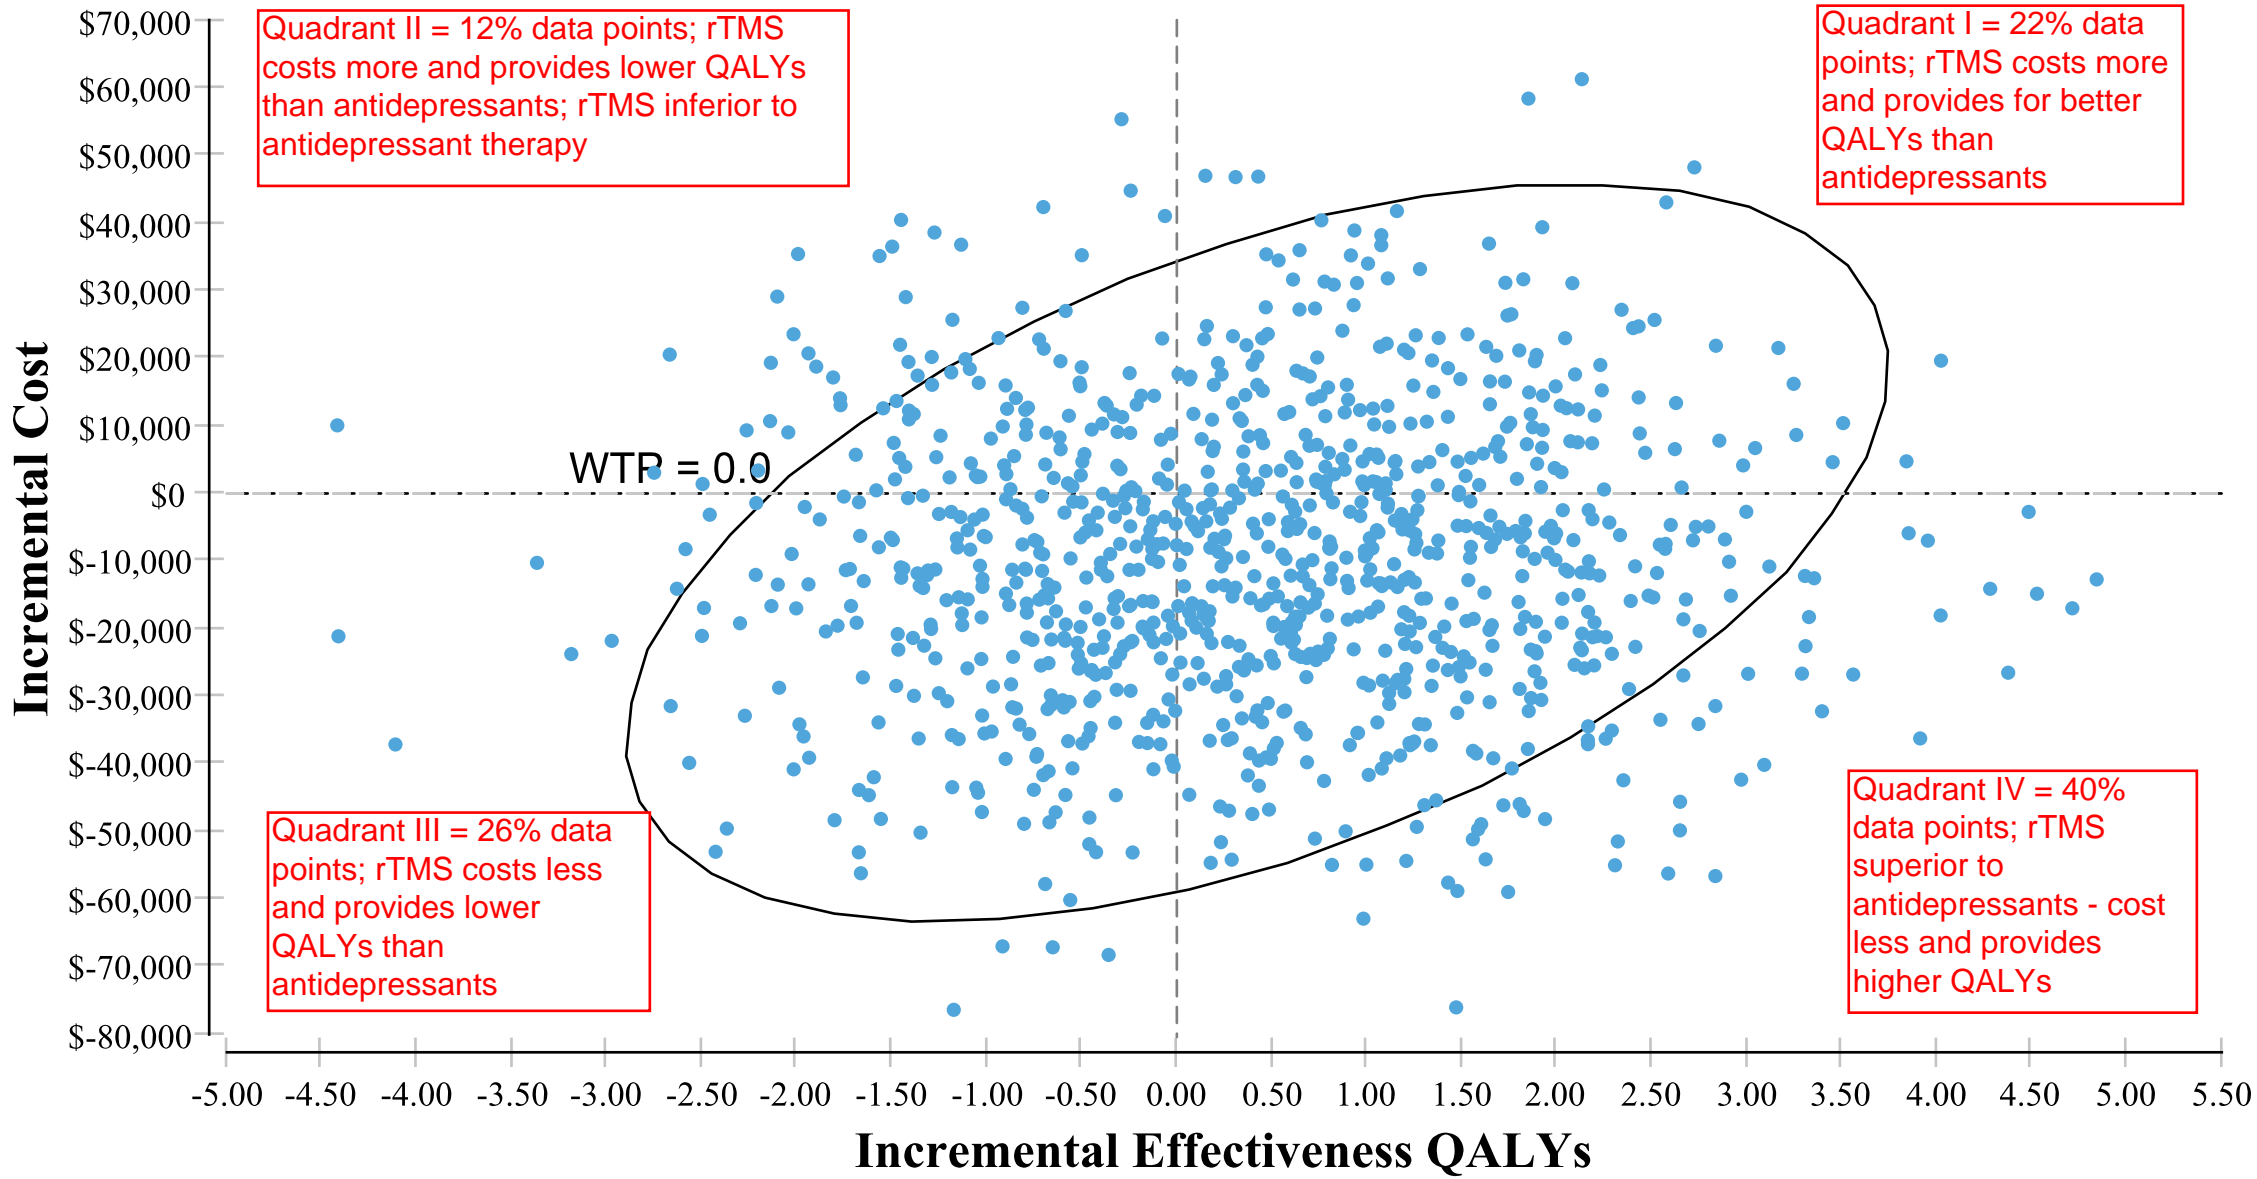

Supplement: S3 (10.1371/journal.pone.0186950.s003) [file journal.pone.0186950.s003]
